# Supplementary material
Source: publisher figshare collection journal article supplement (https://acs.figshare.com/ndownloader/files/13597229)
Supplement: Supplementary file 1 [file 13597229]

# Supporting Information

*of*

## Nanoscale Bupivacaine Formulations to Enhance the Duration and Safety of Intravenous Regional Anesthesia

*Christopher Weldon,<sup>#†§</sup> Tianjiao Ji,<sup>#†</sup> Minh-Thuy Nguyen,<sup>#†</sup> Alina Rwei,<sup>†</sup> Weiping Wang,<sup>†</sup> Yi  
Hao,<sup>†</sup> Chao Zhao,<sup>†</sup> Manisha Mehta,<sup>†</sup> Bruce Y. Wang,<sup>†</sup> Jonathan Tsui,<sup>†</sup> Robert P. Marini,<sup>¶</sup> and  
Daniel S. Kohane<sup>\*†</sup>*

*<sup>†</sup>Laboratory for Biomaterials and Drug Delivery, Department of Anesthesiology, Boston Children's  
Hospital, Harvard Medical School, Boston, Massachusetts 02115, United States*

*<sup>§</sup>Department of Surgery, Boston Children's Hospital, Harvard Medical School, Boston,  
Massachusetts 02115, United States*

*<sup>¶</sup>Division of Comparative Medicine, Massachusetts Institute of Technology, Cambridge,  
Massachusetts 02139, United States*

*<sup>#</sup> These authors contributed equally to this work*

***\*Address correspondence to:***

*Daniel.Kohane@childrens.harvard.edu*

## Supporting Tables and Figures

**Table S1. Anesthesia duration resulting from different tourniquet times.**

| Time (min) | Successful<br>Anesthesia (%) | Anesthesia<br>Duration (h) |
|------------|------------------------------|----------------------------|
| 5          | 0                            | 0                          |
| 10         | 25                           | 0.3 ± 0.5                  |
| 15         | 100                          | 2.0 ± 0.6                  |
| 20         | 100                          | 1.9 ± 0.5                  |
| 30         | 100                          | 2.0 ± 0.5                  |

0.5% bupivacaine (5 mg/mL (w/v), 0.4 mL) was administered by IVRA, and the tourniquet removed at predetermined intervals. Data are means ± S. D.; n = 4. There was no statistically significance difference between 15 min and 20 min treatment.

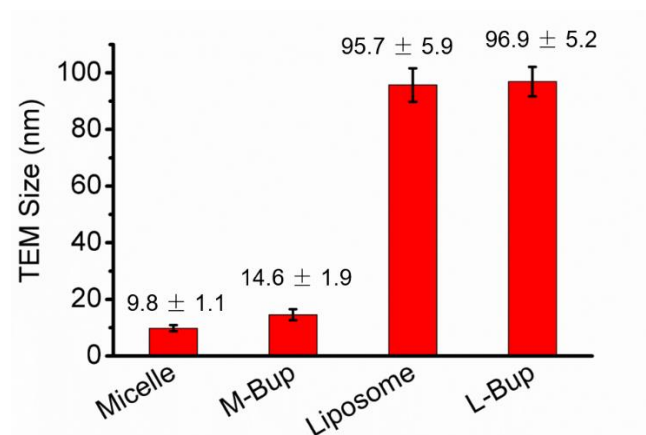

**Figure S1.** The particle size distribution from transmission electron microscope (TEM) images. Data are presented as mean  $\pm$  S. D. (n = 3).

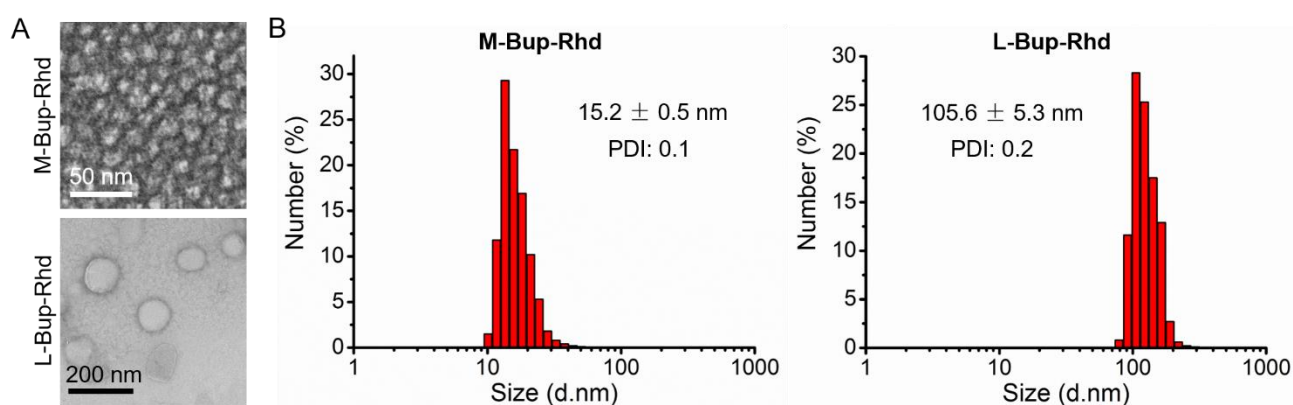

**Figure S2.** Characterization of M-Bup-Rhd and L-Bup-Rhd. (A) Transmission electron microscopy (TEM) images and (B) Dynamic light scattering (DLS) of M-Bup-Rhd and L-Bup-Rhd. Their sizes are similar to the formulations without Rhd labeling. Data are means  $\pm$  S. D.; n = 3.

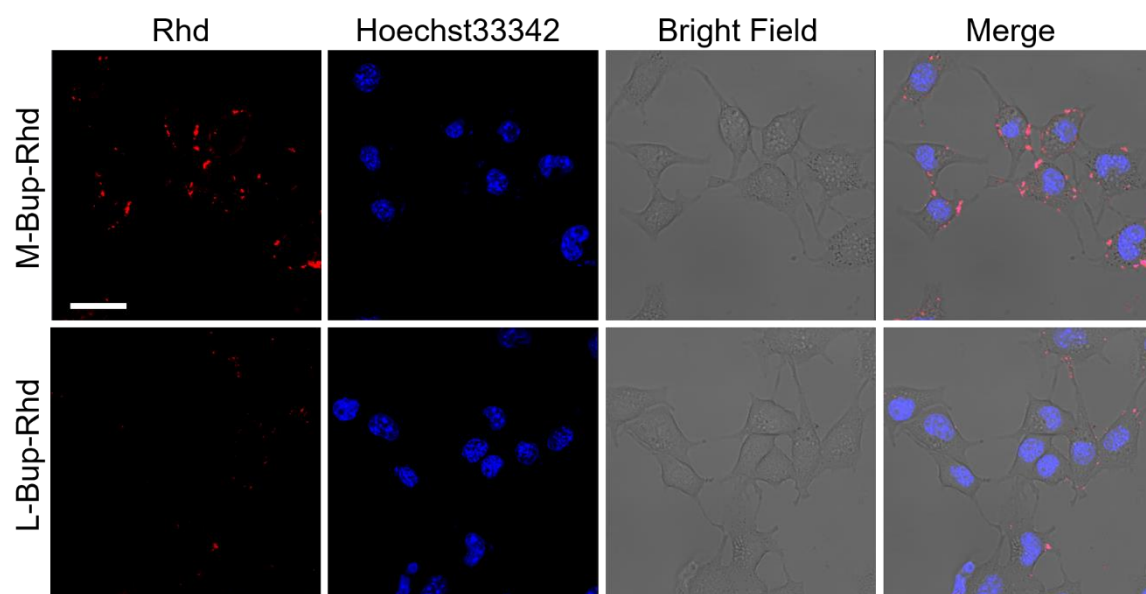

**Figure S3.** Whole images and separate panels of Figure 3A. Red: rhodamine (Rhd); blue: nuclei (Hoechst33342). Scale bar = 50  $\mu\text{m}$ .

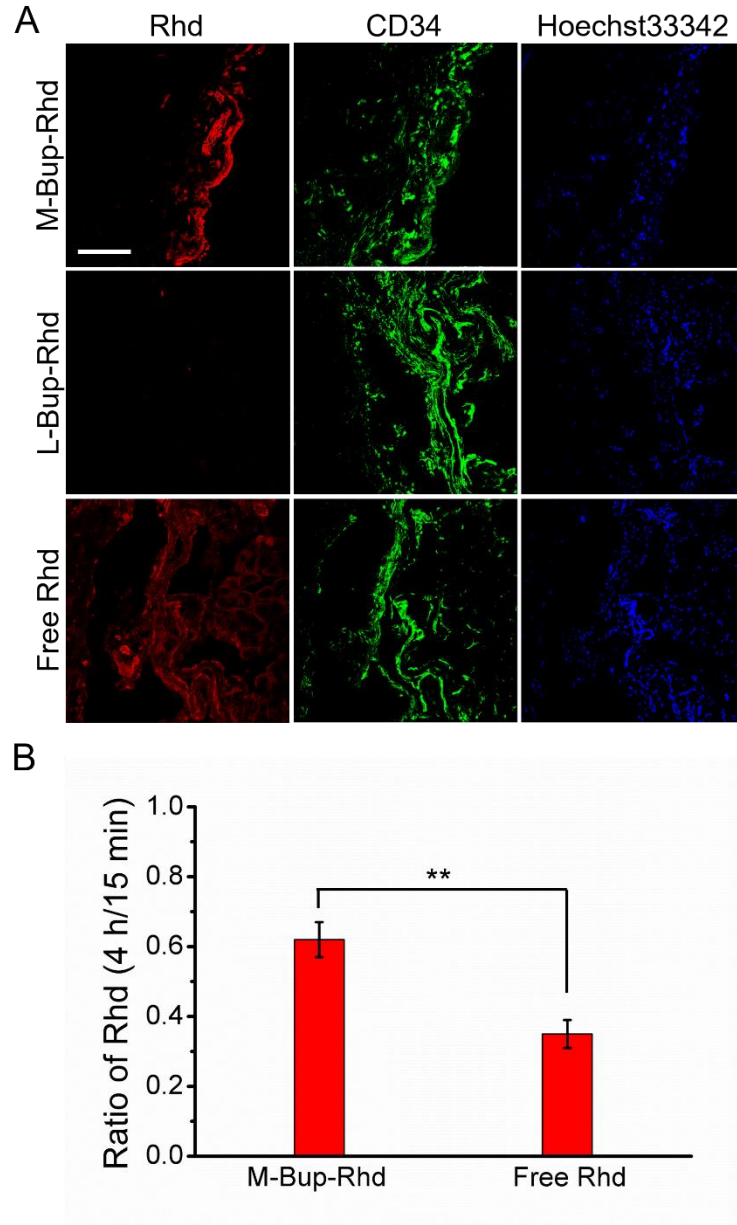

**Figure S4.** Representative (of 4 animals) images of the distribution of Rhd-labeled (red) formulations 4 h after releasing the tourniquet. (A) The blood vessels were IHC labeled with anti-CD34 mAb (green), and the nucleus were stain with Hoechst33342 (blue). The scale bar is 200  $\mu$ m. (B) Ratio of total Rhd signal at 4 h to that at 15 min (see images in Figure 5). The ratios were  $0.62 \pm 0.05$  (M-Bup-Rhd) and  $0.35 \pm 0.04$  (free Rhd), respectively. Data are means  $\pm$  S. D.; n = 4.

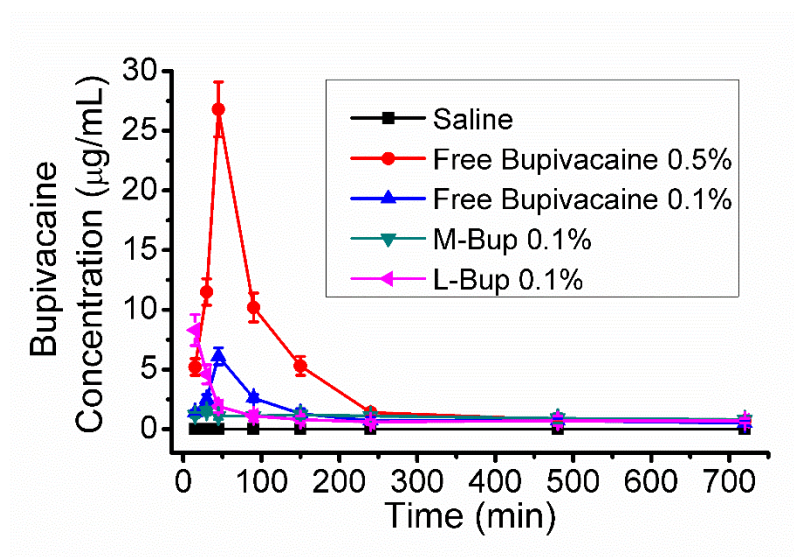

**Figure S5.** Bupivacaine concentration in blood after releasing the tourniquet (at time zero). All the injections were 0.4 mL. No bupivacaine was detected in saline treated animals. Data are means  $\pm$  S.D.; n = 4.

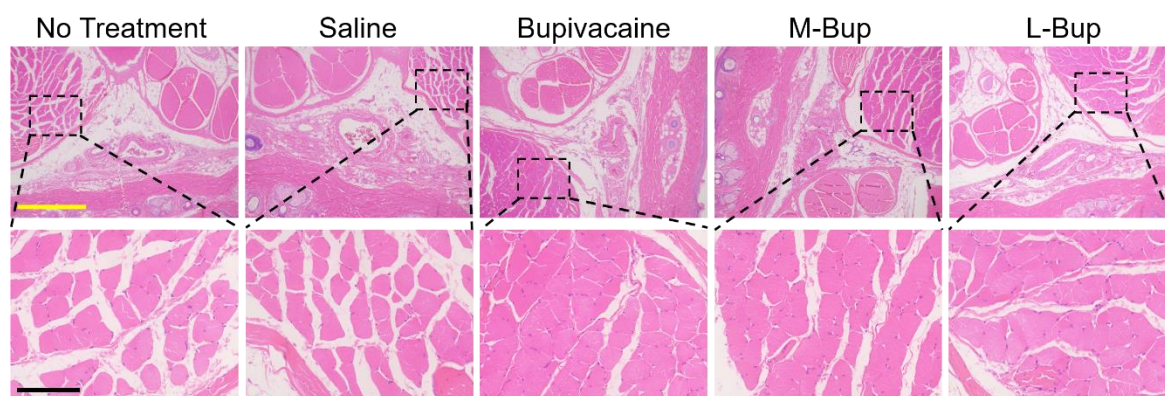

**Figure S6.** Histological evaluation of H&E-stained sections 24 h after treatment. The dotted lines in the top panels are shown in greater detail in the corresponding bottom panels. There were no pathological findings. The yellow scale bar is 200  $\mu$ m, and the black scale bar is 50  $\mu$ m.



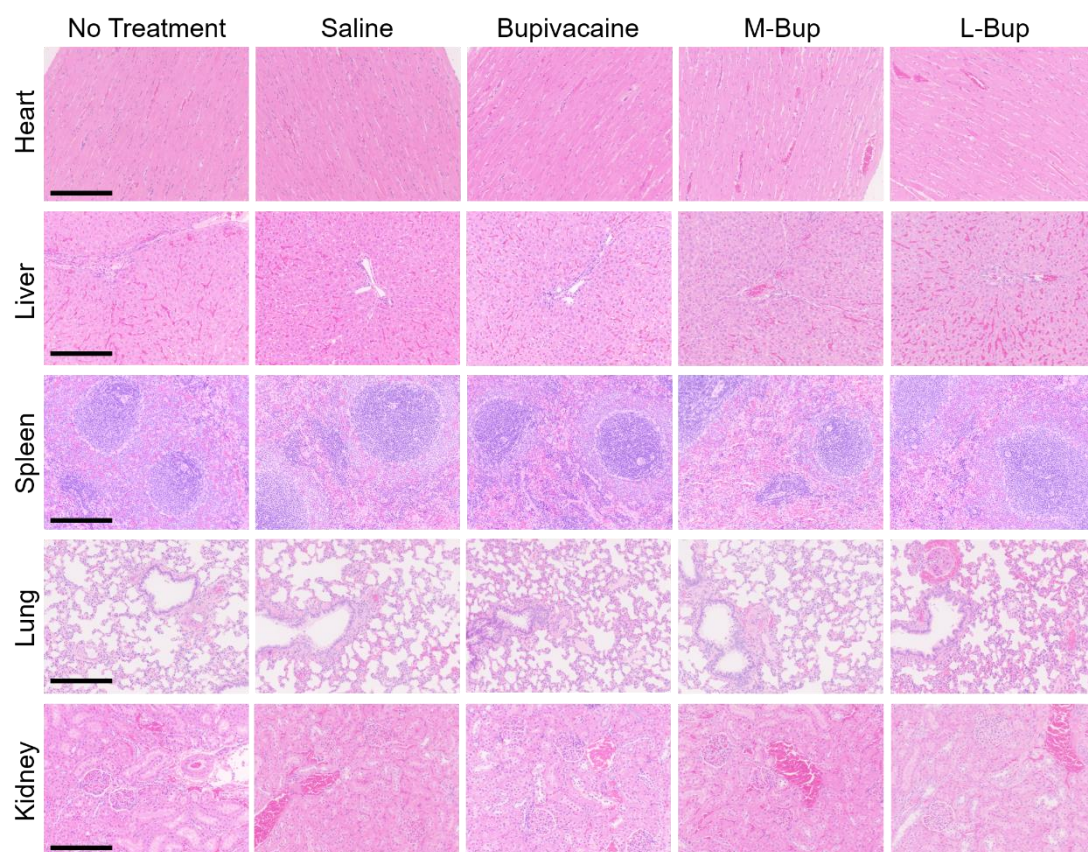

**Figure S7.** H&E-stained sections of heart, liver, spleen, lung and kidney 24 h after IVRA treatment with each formulation. There were no pathological findings. The scale bars are 200  $\mu\text{m}$ .
